# Supplementary material
Source: publisher figshare collection journal article supplement (https://aacr.figshare.com/articles/dataset/_/22488881)

A

Low Grade

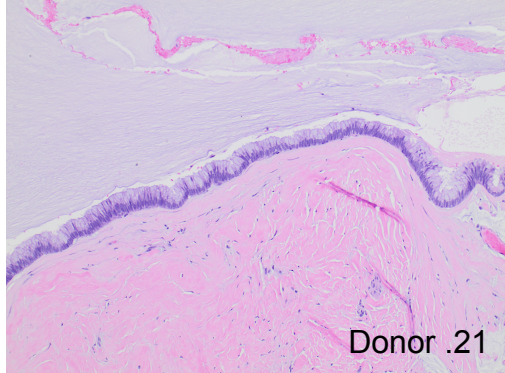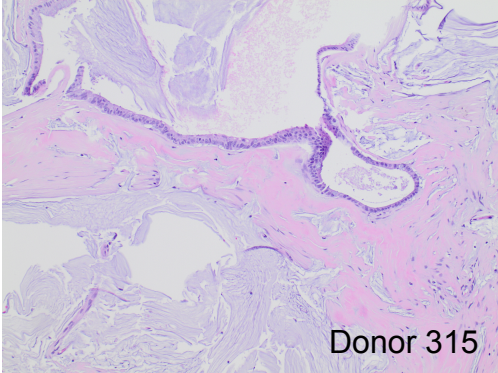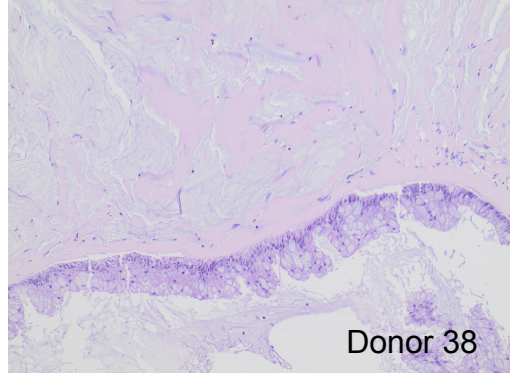

B

Mod / High Grade

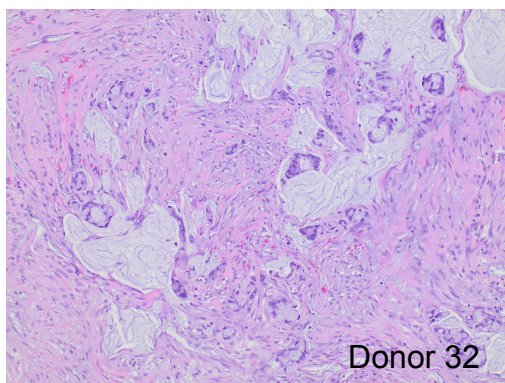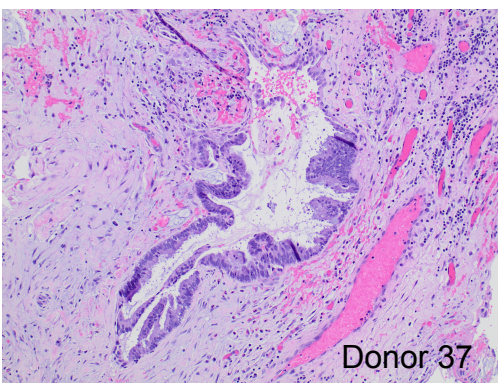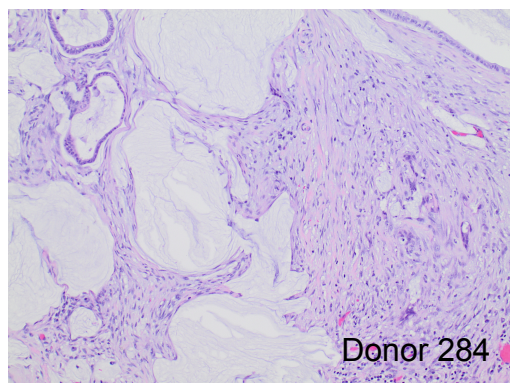

C

Matching Sample to Analysis

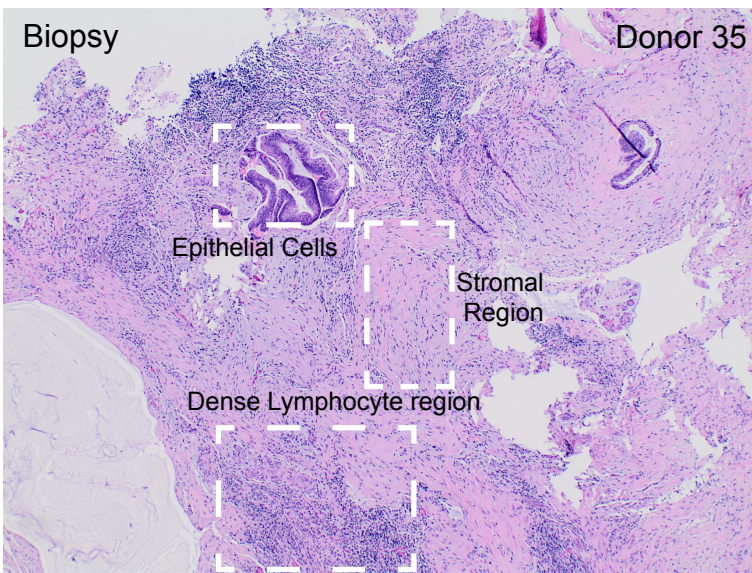

Flow Analysis of Cell Type (matched tissue)

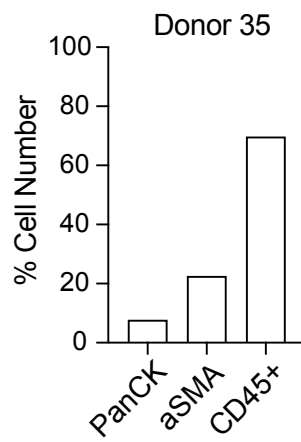

Flow Analysis Leukocyte Type

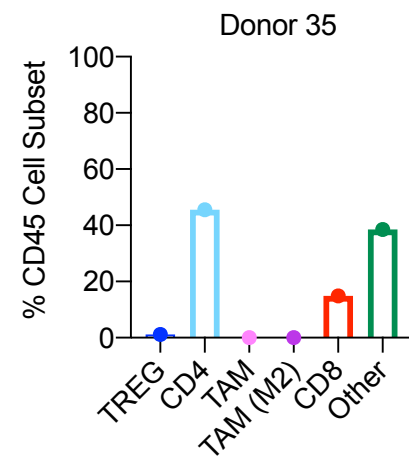

Supplement: Supplementary file 1 [file 39940499]
